# Supplementary material for: Elucidating Genetic Drivers of Chronic Inflammation in Obesity
Source: MDPI journal article supplement (doi:10.3390/biomedicines14020447), 2026-02-17
Supplement: s1 [file biomedicines-4126936-supplementary.pdf › biomedicines-4126936-supplementary.pdf]

## Supplementary Materials

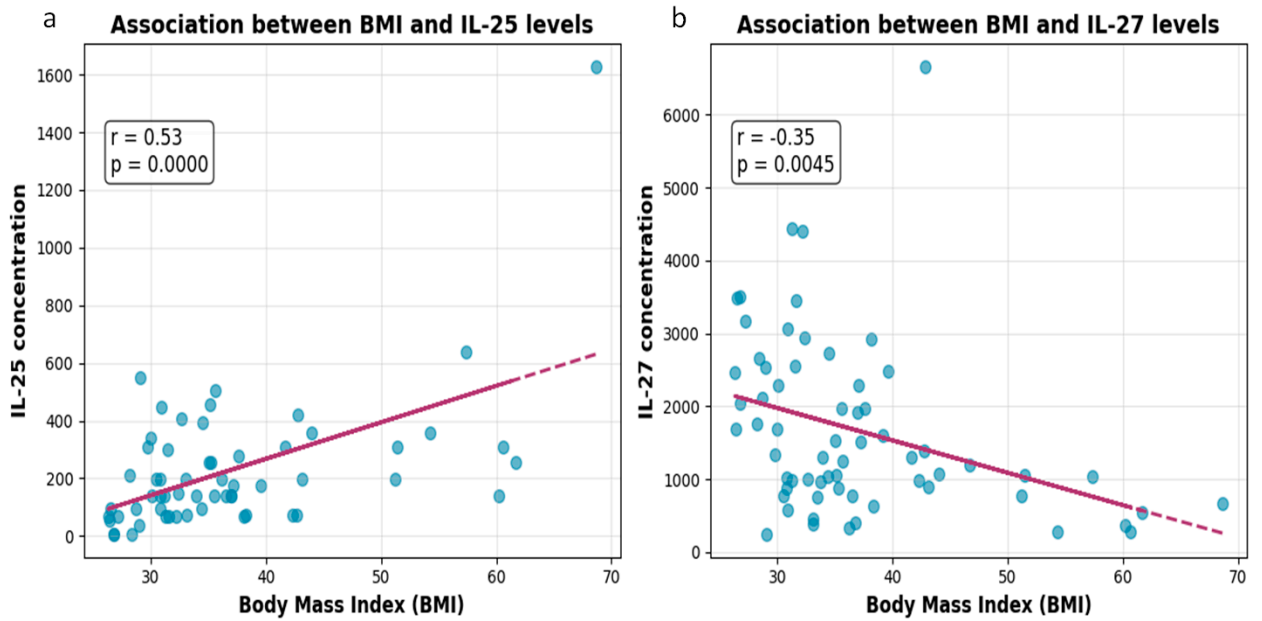

**Figure S1.** Scatter plots illustrating significant associations between cytokine levels and body mass index (BMI). (a) Positive correlation between IL-17E/IL-25 and BMI (Spearman's  $r = 0.44$ , FDR-adjusted  $p = 0.023$ ). (b) Negative correlation between IL-27 and BMI (Spearman's  $r = -0.40$ , FDR-adjusted  $p = 0.023$ ). Trend lines represent the linear regression fit.

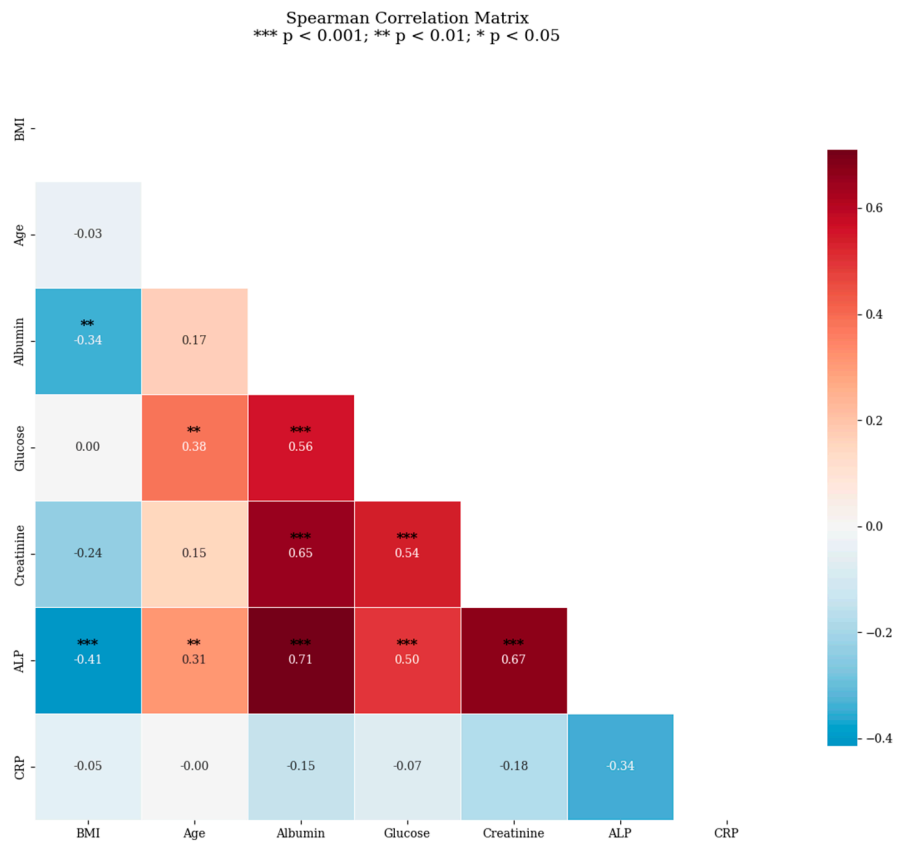

**Figure S2.** Spearman correlation matrix of demographic, anthropometric and biochemical parameters.

**Pearson Correlation Matrix**  
**\*\*\* p < 0.001; \*\* p < 0.01; \* p < 0.05**

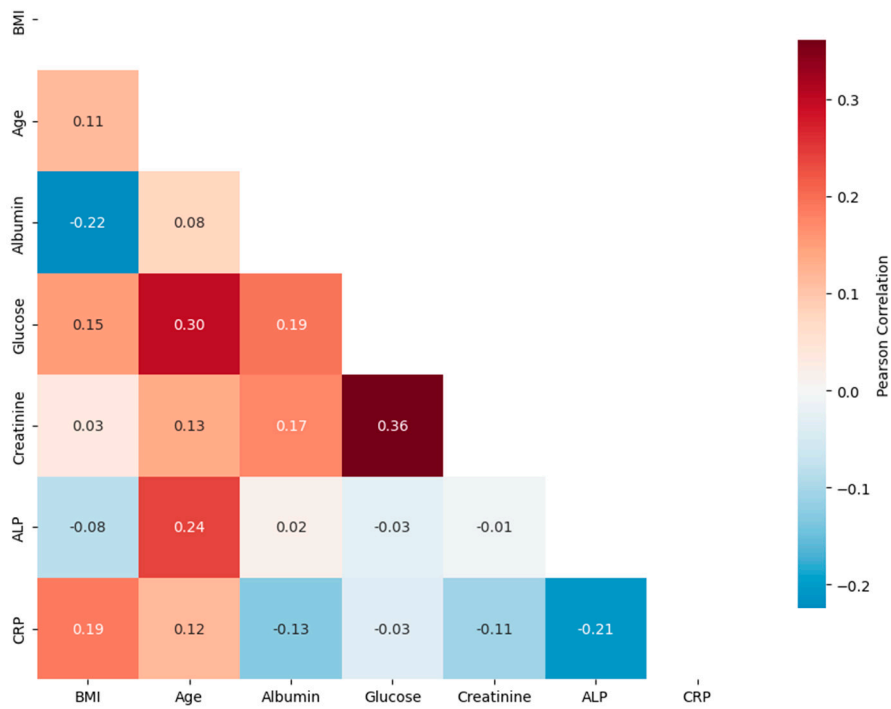

**Figure S3.** Pearson correlation matrix of demographic, anthropometric and biochemical parameters.

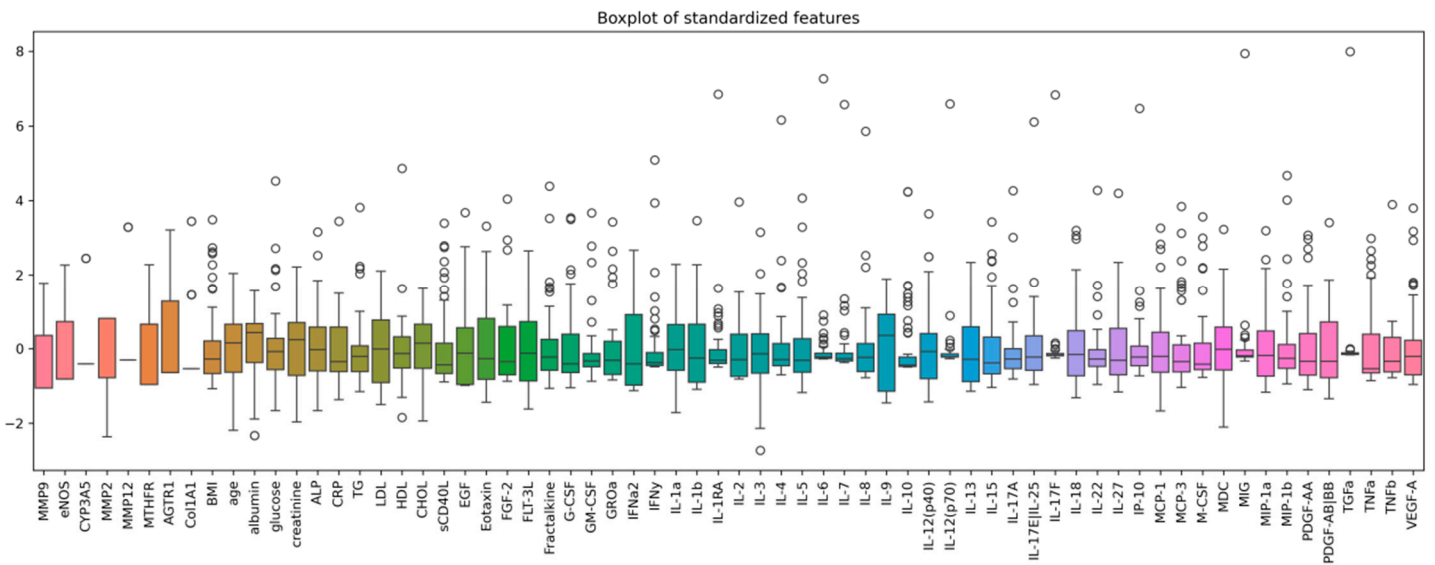

**Figure S4.** Boxplot of standardized features with outliers.

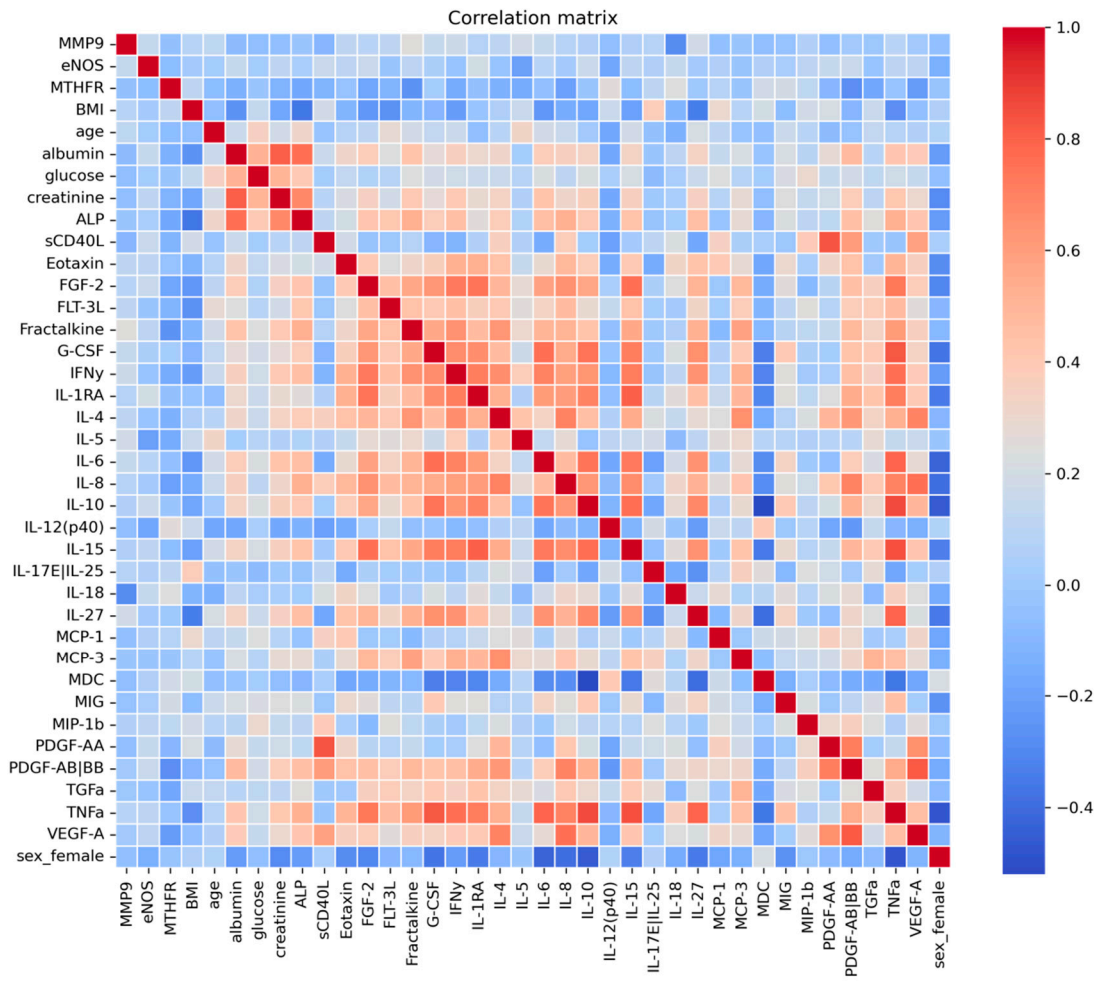

Figure S5. Feature correlations after preprocessing.

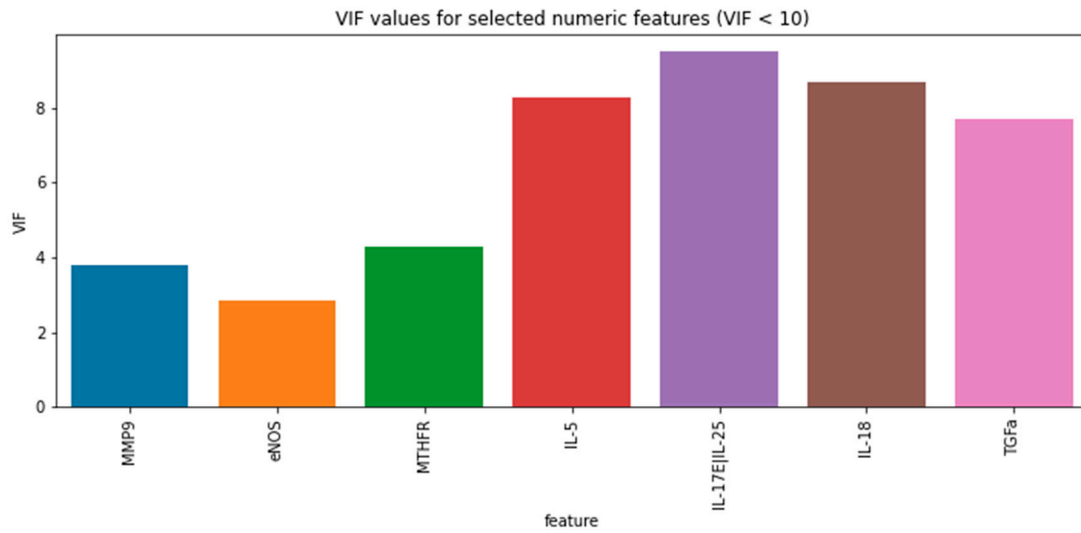

Figure S6. Feature selection using Variance Inflation Factor (VIF).

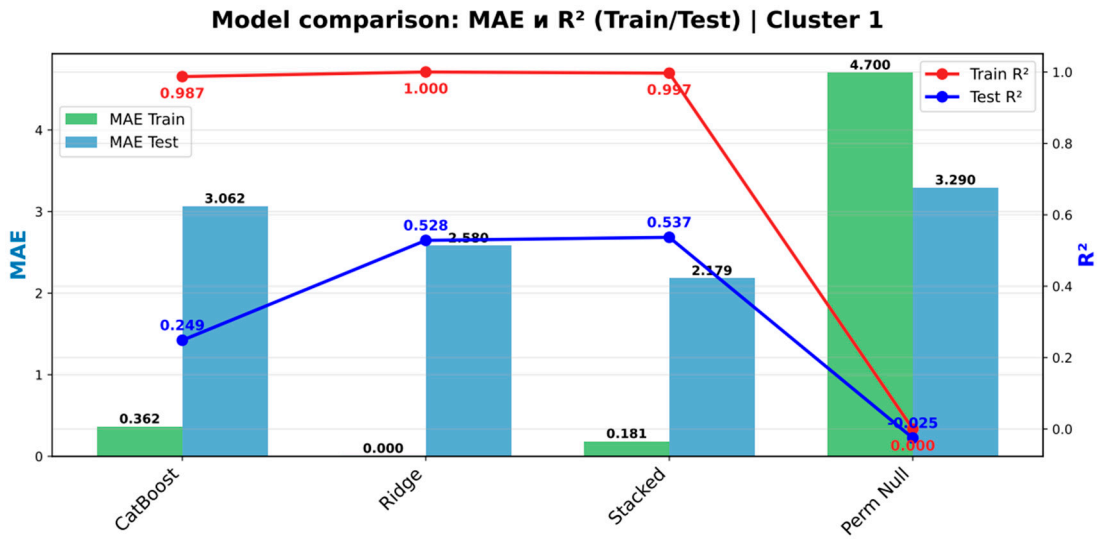

Figure S7. Model comparison for Cluster 1.

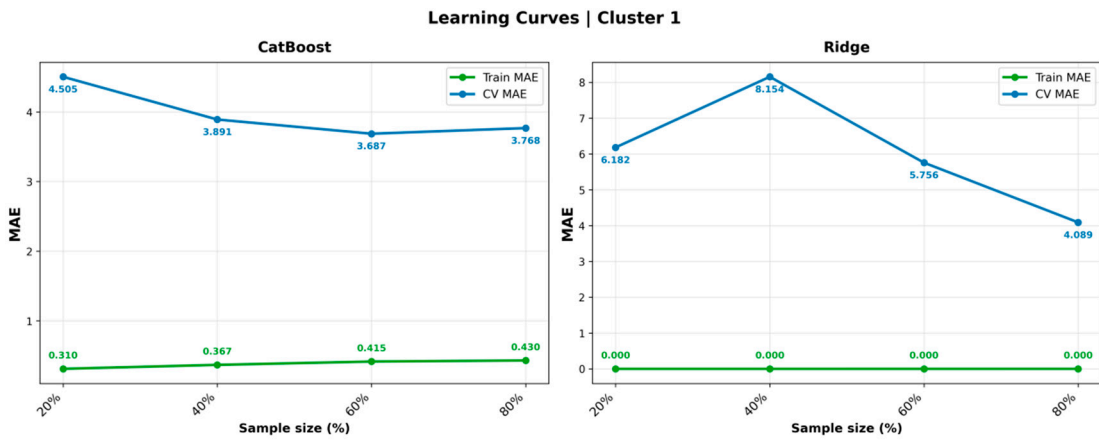

Figure S8. Learning curves for Catboost and Ridge models.

**Table S1.** LOD Values (Overnight Protocol, MinDC+2SD, pg/mL)

| Analyte        | LOD   | Analyte      | LOD   | Analyte      | LOD   |
|----------------|-------|--------------|-------|--------------|-------|
| sCD40L         | 5.95  | IL-4         | 0.28  | IL-17A       | 1.16  |
| EGF            | 3.42  | IL-5         | 0.21  | IL-17E/IL-25 | 52.07 |
| Eotaxin        | 3.26  | IL-6         | 0.20  | IL-17F       | 31.34 |
| FGF-2          | 27.77 | IL-7         | 0.20  | IP-10        | 1.78  |
| FLT-3L         | 0.80  | IL-8         | 0.58  | VEGF-A       | 3.24  |
| Fractalkine    | 34.41 | IL-9         | 0.39  | VEGF-B       | 10.05 |
| G-CSF          | 5.37  | IL-10        | 3.48  | VEGF-C       | 35.82 |
| GM-CSF         | 2.05  | IL-12 (p40)  | 6.31  | VEGF-D       | 6.69  |
| GRO $\alpha$   | 1.42  | IL-12 (p70)  | 1.20  | VEGF-E       | 6.35  |
| IFN $\alpha$ 2 | 9.49  | IL-13        | 3.92  | VEGF-F       | 4.64  |
| IFN $\gamma$   | 1.42  | IL-15        | 1.08  | VEGF-G       | 6.84  |
| IL-1 $\beta$   | 0.79  | IL-1RA       | 1.53  | VEGF-H       | 12.94 |
| IL-2           | 0.46  | IL-10*       | 0.68  | VEGF-I       | 42.76 |
| IL-3           | 0.39  | IL-12 (p40)* | 13.88 | VEGF-J       | 2.66  |

**Table S2.** Baseline Characteristics of the Study Cohort Stratified by BMI Category

| Characteristic                            | Overweight<br>(25-29.9) | Obesity I<br>(30-34.9) | Obesity II<br>(35-39.9) | Obesity III<br>( $\geq$ 40) | Overall         |
|-------------------------------------------|-------------------------|------------------------|-------------------------|-----------------------------|-----------------|
| N                                         | 17                      | 22                     | 17                      | 15                          | 71              |
| Female                                    | 10 (58.8%)              | 19 (86.4%)             | 15 (88.2%)              | 11 (73.3%)                  | 55 (77.5%)      |
| Male                                      | 7 (41.2%)               | 3 (13.6%)              | 2 (11.8%)               | 4 (26.7%)                   | 16 (22.5%)      |
| Age, years                                | 52.2 $\pm$ 15.7         | 50.2 $\pm$ 13.8        | 49.7 $\pm$ 13.1         | 51.4 $\pm$ 15.5             | 50.8 $\pm$ 14.2 |
| Age range                                 | 21-80                   | 24-71                  | 24-67                   | 20-71                       | 20-80           |
| BMI, kg/m <sup>2</sup>                    | 27.9 $\pm$ 1.1          | 32.0 $\pm$ 1.4         | 36.9 $\pm$ 1.4          | 51.2 $\pm$ 8.8              | 36.3 $\pm$ 9.4  |
| Current smokers                           | 2 (11.8%)               | 4 (18.2%)              | 1 (5.9%)                | 4 (26.7%)                   | 11 (15.5%)      |
| Alcohol users                             | 3 (17.6%)               | 6 (27.3%)              | 3 (17.6%)               | 1 (6.7%)                    | 13 (18.3%)      |
| Impaired fasting glucose (5.6-6.9 mmol/L) | 3 (17.6%)               | 5 (22.7%)              | 2 (11.8%)               | 2 (13.3%)                   | 12 (16.9%)      |
| Hyperglycemia ( $\geq$ 7.0 mmol/L)        | 0 (0.0%)                | 1 (4.5%)               | 1 (5.9%)                | 4 (26.7%)                   | 6 (8.5%)        |
| TG >1.7 mmol/L                            | 1 (5.9%)                | 1 (4.5%)               | 4 (23.5%)               | 2 (13.3%)                   | 8 (11.3%)       |
| LDL >3.0 mmol/L                           | 2 (11.8%)               | 3 (13.6%)              | 5 (29.4%)               | 6 (40.0%)                   | 16 (22.5%)      |
| HDL <1.0 mmol/L                           | 0 (0.0%)                | 3 (13.6%)              | 3 (17.6%)               | 2 (13.3%)                   | 8 (11.3%)       |
| Total cholesterol >5.2 mmol/L             | 1 (5.9%)                | 2 (9.1%)               | 4 (23.5%)               | 4 (26.7%)                   | 11 (15.5%)      |
| Dyslipidemia (any abnormality)            | 3 (17.6%)               | 7 (31.8%)              | 10 (58.8%)              | 8 (53.3%)                   | 28 (39.4%)      |

|                           |           |           |           |           |            |
|---------------------------|-----------|-----------|-----------|-----------|------------|
| CRP >5 mg/L               | 5 (29.4%) | 4 (18.2%) | 0 (0.0%)  | 1 (6.7%)  | 10 (14.1%) |
| Type 1 diabetes           | 0 (0.0%)  | 1 (4.5%)  | 0 (0.0%)  | 0 (0.0%)  | 1 (1.4%)   |
| Type 2 diabetes           | 0 (0.0%)  | 0 (0.0%)  | 0 (0.0%)  | 2 (13.3%) | 2 (2.8%)   |
| Arterial hypertension     | 3 (17.6%) | 5 (22.7%) | 3 (17.6%) | 8 (53.3%) | 19 (26.8%) |
| Cardiovascular disease    | 0 (0.0%)  | 2 (9.1%)  | 1 (5.9%)  | 2 (13.3%) | 5 (7.0%)   |
| Thyroid disorders         | 1 (5.9%)  | 3 (13.6%) | 1 (5.9%)  | 1 (6.7%)  | 6 (8.5%)   |
| Pancreatitis              | 1 (5.9%)  | 2 (9.1%)  | 3 (17.6%) | 0 (0.0%)  | 6 (8.5%)   |
| Gastritis                 | 1 (5.9%)  | 5 (22.7%) | 2 (11.8%) | 0 (0.0%)  | 8 (11.3%)  |
| Cholecystitis             | 0 (0.0%)  | 5 (22.7%) | 1 (5.9%)  | 0 (0.0%)  | 6 (8.5%)   |
| Liver disease             | 0 (0.0%)  | 0 (0.0%)  | 0 (0.0%)  | 1 (6.7%)  | 1 (1.4%)   |
| Respiratory disease       | 2 (11.8%) | 0 (0.0%)  | 2 (11.8%) | 1 (6.7%)  | 5 (7.0%)   |
| Musculoskeletal disorders | 1 (5.9%)  | 5 (22.7%) | 5 (29.4%) | 3 (20.0%) | 14 (19.7%) |
| Allergic diseases         | 0 (0.0%)  | 0 (0.0%)  | 1 (5.9%)  | 0 (0.0%)  | 1 (1.4%)   |

**Table S3.** Robustness analysis of SNP-cytokine associations

| SNP        | Cytokine        | Model       | $\beta$ (95% CI)            | p_OLS       | p_BoxCo<br>x   | p_Ran<br>k   | p_Hub<br>er  | All_sig         |
|------------|-----------------|-------------|-----------------------------|-------------|----------------|--------------|--------------|-----------------|
| COL1<br>A1 | IL-6            | CA vs<br>CC | -1.335 [-2.224, -<br>0.446] | 0,0038      | 0.0031         | 0.0040       | 0.0092       | Yes             |
| MTHF<br>R  | MIP-1b          | AC vs<br>AA | 0.363 [0.113,<br>0.612]     | 0,005       | 0.0036         | 0.0061       | 0.0026       | Yes             |
| NOS3       | Eotaxin         | GT vs<br>GG | 0.792 [0.232,<br>1.351]     | 0,0063      | 0.0066         | 0.0047       | 0.0093       | Yes             |
| NOS3       | MCP-1           | GT vs<br>GG | 0.552 [0.160,<br>0.945]     | 0,0066      | 0.0075         | 0.0030       | 0.0179       | Yes             |
| AGTR<br>1  | IP-10           | AC vs<br>AA | 0.992 [0.261,<br>1.723]     | 0,0092      | 0.0001         | 0.0001       | 0.0002       | Yes             |
| MMP2       | IL-7            | CT vs<br>TT | 0.863 [0.167,<br>1.559]     | 0,0165      | 0.0173         | 0.0247       | 0.0115       | Yes             |
| MMP2       | Fractalki<br>ne | CT vs<br>TT | 0.559 [0.103,<br>1.016]     | 0,0178      | 0.0169         | 0.0062       | 0.0046       | Yes             |
| MMP9       | IL-10           | AA vs<br>AG | -0.848 [-1.602, -<br>0.094] | 0,0281      | NA             | 0.0468       | 0.0498       | Yes*            |
| AGTR<br>1  | TNF $\alpha$    | AC vs<br>AA | 0.556 [0.033,<br>1.079]     | 0,038       | 0.0349         | 0.0411       | 0.0723       | No              |
|            |                 | Add_AI<br>C | Dom_AIC                     | Rec_AI<br>C | Best_mod<br>el | $\Delta$ AIC | Balanc<br>ed | Robust_co<br>nf |
| COL1<br>A1 | IL-6            | 283,5       | 281,5                       | 285,5       | Dom            | 2            | Yes          | Yes             |
| MTHF<br>R  | MIP-1b          | 224,2       | 222,2                       | 226,2       | Dom            | 2            | Yes          | Yes             |
| NOS3       | Eotaxin         | 234         | 232                         | 236         | Dom            | 2            | Yes          | Yes             |
| NOS3       | MCP-1           | 279,4       | 277,4                       | 281,4       | Dom            | 2            | Yes          | Yes             |
| AGTR<br>1  | IP-10           | 136,5       | 134,5                       | 138,5       | Dom            | 2            | Yes          | Yes             |
| MMP2       | IL-7            | 132,6       | 134,6                       | 130,6       | Rec            | 4            | Yes          | Yes             |
| MMP2       | Fractalki       | 99,9        | 101,9                       | 97,9        | Rec            | 4            | Yes          | Yes             |

|      |       |       |       |       |     |   |     |     |
|------|-------|-------|-------|-------|-----|---|-----|-----|
|      | ne    |       |       |       |     |   |     |     |
| MMP9 | IL-10 | 277,6 | 275,6 | 279,6 | Dom | 2 | Yes | Yes |
| AGTR |       |       |       |       |     |   |     |     |
| 1    | TNFa  | 113,7 | 111,7 | 115,7 | Dom | 2 | Yes | Yes |

**Table S4.** Associations of cytokine levels with BMI and age

| Cytokine    | BMI_Correlation | BMI_P_Value | Age_Correlation | Age_P_Value | BMI_FDR_P_Value | BMI_FDR_Significant | Age_FDR_P_Value | Age_FDR_Significant |
|-------------|-----------------|-------------|-----------------|-------------|-----------------|---------------------|-----------------|---------------------|
| sCD40       |                 |             |                 | 0,16518     |                 |                     |                 |                     |
| L           | 0,309486        | 0,012828    | -0,17284        | 6           | 0,150725        | no                  | 0,408653        | no                  |
| EGF         | 0,07843         | 0,604388    | -0,01274        | 0,93153     | 0,728365        | no                  | 0,951787        | no                  |
| Eotaxin     | -0,15           | 0,236776    | 0,137735        | 0,27009     | 0,483846        | no                  | 0,505174        | no                  |
| FGF-2       | -0,23977        | 0,077871    | 0,277621        | 0,03654     | 0,261425        | no                  | 0,250629        | no                  |
| FLT-3L      | -0,29321        | 0,01969     | 0,329245        | 0,00740     | 0,18509         | no                  | 0,250629        | no                  |
| Fractalkine | -0,1534         | 0,230028    | 0,260205        | 0,03631     | 0,483846        | no                  | 0,250629        | no                  |
| G-CSF       | -0,19395        | 0,127738    | 0,203615        | 0,10377     | 0,375229        | no                  | 0,336066        | no                  |
| GM-CSF      | 0,080538        | 0,655929    | 0,173423        | 0,31910     | 0,751919        | no                  | 0,54375         | no                  |
| GROa        | -0,28676        | 0,076735    | -0,01448        | 0,93027     | 0,261425        | no                  | 0,951787        | no                  |
| IFNa2       | -0,0769         | 0,591691    | 0,227097        | 0,10198     | 0,728365        | no                  | 0,336066        | no                  |
| IFNy        | -0,27694        | 0,040669    | 0,257217        | 0,05341     | 0,245414        | no                  | 0,313805        | no                  |
| IL-1a       | 0,149598        | 0,326678    | 0,207943        | 0,16074     | 0,562301        | no                  | 0,408653        | no                  |
| IL-1b       | -0,15217        | 0,301835    | 0,112911        | 0,43497     | 0,562301        | no                  | 0,601287        | no                  |
| IL-1RA      | -0,02834        | 0,834226    | 0,058507        | 0,65981     | 0,884322        | no                  | 0,783087        | no                  |
| IL-2        | -0,17646        | 0,388511    | 0,262852        | 0,18529     | 0,589032        | no                  | 0,435444        | no                  |
| IL-3        | 0,282951        | 0,069417    | 0,246149        | 0,10725     | 0,261425        | no                  | 0,336066        | no                  |
| IL-4        | 0,10465         | 0,438507    | 0,082428        | 0,53482     | 0,644057        | no                  | 0,661498        | no                  |
| IL-5        | 0,109164        | 0,386697    | 0,29595         | 0,01503     | 0,589032        | no                  | 0,250629        | no                  |
| IL-6        | -0,17834        | 0,192679    | 0,276513        | 0,03732     | 0,466476        | no                  | 0,250629        | no                  |
| IL-7        | -0,26502        | 0,065718    | 0,161989        | 0,25609     | 0,261425        | no                  | 0,505174        | no                  |
| IL-8        | -0,12377        | 0,346113    | 0,179639        | 0,16238     | 0,562301        | no                  | 0,408653        | no                  |
| IL-9        | 0,181168        | 0,346952    | 0,330026        | 0,07489     | 0,562301        | no                  | 0,32001         | no                  |
| IL-10       | -0,17718        | 0,183352    | -0,00184        | 0,98889     | 0,466476        | no                  | 0,988891        | no                  |

|            |          |          |          |         |   |          |    |          |    |
|------------|----------|----------|----------|---------|---|----------|----|----------|----|
| IL-12(p40) | 0,121352 | 0,343424 | -0,08857 | 0,48293 | 3 | 0,562301 | no | 0,630496 | no |
| IL-12(p70) | -0,11334 | 0,458503 | 0,164779 | 0,26836 | 4 | 0,65265  | no | 0,505174 | no |
| IL-13      | 0,035583 | 0,846691 | 0,14803  | 0,41100 | 6 | 0,884322 | no | 0,601287 | no |
| IL-15      | -0,25728 | 0,047204 | 0,215431 | 0,09264 | 7 | 0,245414 | no | 0,336066 | no |
| IL-17A     | 0,21043  | 0,1985   | -0,07029 | 0,66645 | 7 | 0,466476 | no | 0,783087 | no |
| IL-17E1    |          |          |          | 0,38354 |   |          |    |          |    |
| IL-25      | 0,43929  | 0,0005   | -0,11356 | 0,38354 | 5 | 0,023195 | da | 0,586238 | no |
| IL-17F     | 0,172662 | 0,251189 | 0,181041 | 0,21816 |   | 0,491912 | no | 0,488264 | no |
| IL-18      | -0,08866 | 0,486016 | -0,10831 | 0,38666 | 7 | 0,65265  | no | 0,586238 | no |
| IL-22      | 0,286686 | 0,147111 | 0,264727 | 0,1652  |   | 0,406718 | no | 0,408653 | no |
| IL-27      | -0,40217 | 0,000987 | 0,26427  | 0,03201 | 7 | 0,023195 | da | 0,250629 | no |
| IP-10      | 0,037508 | 0,787721 | 0,147056 | 0,27945 | 8 | 0,860998 | no | 0,505174 | no |
| MCP-1      | 0,243799 | 0,052216 | 0,090584 | 0,46947 | 6 | 0,245414 | no | 0,630439 | no |
| MCP-3      | -0,01952 | 0,881282 | 0,012162 | 0,92463 |   | 0,90044  | no | 0,951787 | no |
| M-CSF      | -0,22374 | 0,10729  | 0,135504 | 0,32393 | 6 | 0,336176 | no | 0,54375  | no |
| MDC        | 0,16014  | 0,20994  | -0,03985 | 0,75262 |   | 0,469866 | no | 0,847226 | no |
| MIG        | -0,08091 | 0,525072 | 0,279539 | 0,02301 | 9 | 0,666984 | no | 0,250629 | no |
| MIP-1a     | -0,06915 | 0,636861 | 0,25688  | 0,06880 | 7 | 0,748312 | no | 0,32001  | no |
| MIP-1b     | 0,252454 | 0,04592  | 0,039108 | 0,75709 | 6 | 0,245414 | no | 0,847226 | no |
| PDGF-AA    | 0,257237 | 0,040169 | -0,14936 | 0,23131 | 1 | 0,245414 | no | 0,494165 | no |
| PDGF-B     | -0,04322 | 0,734508 | -0,01332 | 0,91544 | 9 | 0,82195  | no | 0,951787 | no |
| TGFa       | 0,090346 | 0,481321 | 0,111962 | 0,37456 | 8 | 0,65265  | no | 0,586238 | no |
| TNFa       | -0,31447 | 0,011383 | 0,224746 | 0,06963 | 9 | 0,150725 | no | 0,32001  | no |
| TNFb       | -0,1533  | 0,507064 | 0,149123 | 0,51883 | 3 | 0,662001 | no | 0,659059 | no |
| VEGF-A     | -0,00971 | 0,939317 | 0,100086 | 0,42395 | 7 | 0,939317 | no | 0,601287 | no |

**Table S5.** Genotype distribution and Hardy-Weinberg equilibrium analysis

|               | Group   | n  | Genotypes                                      | HWE p-value | Between-group p-value |
|---------------|---------|----|------------------------------------------------|-------------|-----------------------|
| <i>MMP9</i>   | Obesity | 72 | AG: 31 (43.1%); AA: 30 (41.7%); GG: 11 (15.3%) | 0.528       | 0.185                 |
|               | Control | 52 | AG: 31 (59.62%); AA: 16 (30.77%); GG: 5 (9.6%) | 0.073       |                       |
| <i>eNOS</i>   | Obesity | 71 | GG: 38 (53.5%); GT: 27 (38.0%); TT: 6 (8.5%)   | 0.701       | 0.173                 |
|               | Control | 51 | GT: 22 (43.1%); GG: 20 (39.2%); TT: 9 (17.6%)  | 0.497       |                       |
| <i>CYP3A5</i> | Obesity | 43 | AA: 36 (83.7%); AG: 7 (16.3%)                  | 0.561       | 0.609                 |
|               | Control | 55 | AA: 43 (78.2%); AG: 12 (21.8%)                 | 0.364       |                       |
| <i>MMP2</i>   | Obesity | 43 | TT: 24 (55.8%); CT: 15 (34.9%); CC: 4 (9.3%)   | 0.472       | 0.812                 |
|               | Control | 21 | TT: 12 (57.1%); CT: 8 (38.1%); CC: 1 (4.8%)    | 0.819       |                       |
| <i>MMP12</i>  | Obesity | 72 | AA: 66 (91.7%); AG: 6 (8.3%)                   | 0.712       | 1.000                 |
|               | Control | 49 | AA: 45 (91.8%); AG: 4 (8.2%)                   | 0.766       |                       |
| <i>MTHFR</i>  | Obesity | 72 | AC: 34 (47.2%); AA: 33 (45.8%); CC: 5 (6.9%)   | 0.339       | 0.363                 |
|               | Control | 52 | AA: 28 (53.8%); AC: 23 (44.2%); CC: 1 (1.9%)   | 0.128       |                       |
| <i>AGTR1</i>  | Obesity | 43 | AA: 30 (69.8%); AC: 12 (27.9%); CC: 1 (2.3%)   | 0.876       | 0.673                 |
|               | Control | 21 | AA: 16 (76.2%); AC: 4 (19.0%); CC: 1 (4.8%)    | 0.309       |                       |
| <i>Col1A1</i> | Obesity | 72 | CC: 54 (75.0%); CA: 16 (22.2%); AA: 2 (2.8%)   | 0.547       | 0.771                 |
|               | Control | 52 | CC: 36 (69.2%); CA: 14 (26.9%); AA: 2 (3.8%)   | 0.668       |                       |

**Table S6.** Results of predictive modelling for Cluster 1.

| Model     | MAE_train | R <sup>2</sup> _train | MAE_test | R <sup>2</sup> _test |
|-----------|-----------|-----------------------|----------|----------------------|
| CatBoost  | 0.362     | 0.987                 | 3.062    | 0.249                |
| Ridge     | 0.000     | 1.000                 | 2.580    | 0.528                |
| Stacked   | 0.181     | 0.997                 | 2.179    | 0.537                |
| Perm Null | 4.700     | 0.000                 | 3.290    | -0.025               |
